# Supplementary material for: Social-ecological drivers of metropolitan residents’ comfort living with wildlife
Source: Frontiers journal article supplement (doi:10.3389/fcosc.2023.1248238), 2023-11-02
Supplement: Data_Sheet_1.docx [file Data_Sheet_1.docx]

Supplementary Material

Social-Ecological Drivers of Metropolitan Residents’ Comfort Living with Wildlife

**Haight, Jeffrey D.*; Kelli L. Larson; Jeffrey A.G Clark; Jesse S. Lewis; Sharon J. Hall**

*** Correspondence:** Jeffrey D. Haight: jdhaight@asu.edu

# Supplementary Data

## Supplementary Tables

**Supplementary Table 1.** Results for tests of multi-collinearity among explanatory variables in global mixed effect models of wildlife attitudes. Values depict the Variable Importance Factor (VIF) and tolerance levels, and their corresponding 95% confidence interval (CI), for each explanatory variable.

| **Variable Subset** | **Explanatory Variable** | **VIF (95% CI)** |  | **Tolerance (95% CI)** |
| --- | --- | --- | --- | --- |
| Ideological | Wildlife Value Orientation | 1.21 (1.11, 1.38) |  | 0.83 (0.73, 0.90) |
|  | Desert Identity | 1.44 (1.30, 1.64) |  | 0.70 (0.61, 0.77) |
| Environmental | Urbanization | 1.09 (1.03, 1.29) |  | 0.92 (0.78, 0.97) |
|  | Vegetation | 1.24 (1.14, 1.41) |  | 0.81 (0.71, 0.88) |
|  | Distance to Desert Parks | 1.45 (1.31, 1.66) |  | 0.69 (0.60, 0.76) |
|  | Desert Park Visitation | 1.29 (1.18, 1.47) |  | 0.77 (0.68, 0.85) |
| Sociodemographic | Income | 1.55 (1.39, 1.77) |  | 0.65 (0.56, 0.72) |
|  | Education | 1.29 (1.18, 1.47) |  | 0.78 (0.68, 0.85) |
|  | Age | 1.25 (1.15, 1.43) |  | 0.80 (0.70, 0.87) |
|  | Pets | 1.14 (1.06, 1.30) |  | 0.88 (0.76, 0.94) |
|  | Gender | 1.06 (1.01, 1.30) |  | 0.94 (0.77, 0.99) |
|  | Black Identity | 1.49 (1.34, 1.70) |  | 0.67 (0.59, 0.75) |
|  | Latino Identity | 2.22 (1.95, 2.56) |  | 0.45 (0.39, 0.51) |
|  | White Identity | 2.32 (2.03, 2.68) |  | 0.43 (0.37, 0.49) |

## Supplementary Figures


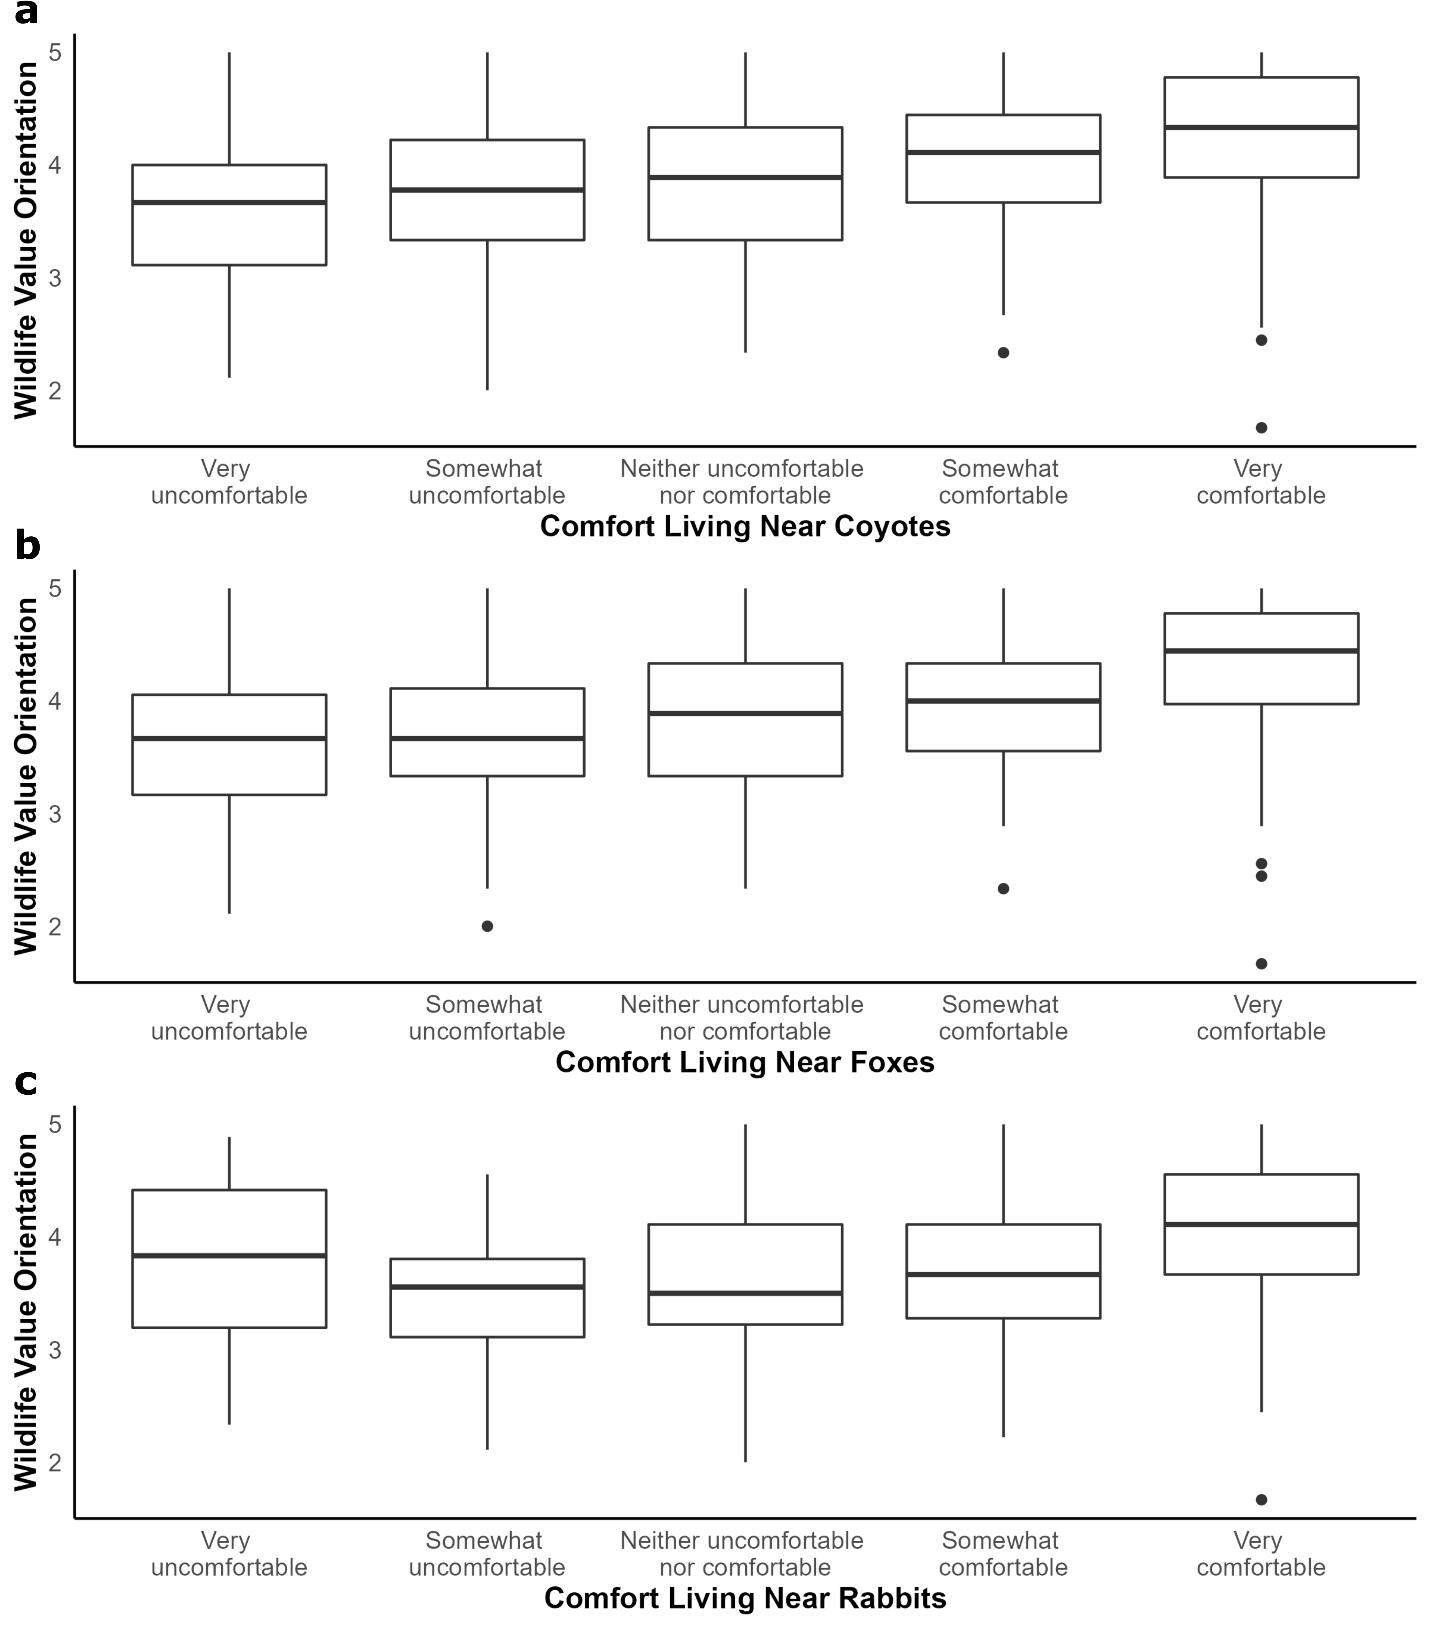


**Supplementary Figure 1.** Wildlife value orientations of residents from twelve neighborhoods across the Phoenix Metropolitan Area, Arizona, USA, relative to their reported levels of comfort living near three wildlife groups: coyotes (a), foxes (b), and rabbits (c).
